# Supplementary material
Source: publisher site journal article supplement (https://www.spandidos-publications.com/1382/downloadSupplementary)

Figure S1. All datasets can be obtained from cBioPortal (<http://www.cbioportal.org/>), which hosts multiple cancer genomics studies, including all of the data from The Cancer Genome Atlas. (A) Mutation frequency of PGC-1 $\alpha$  in patients with prostate cancer. (B) Survival analysis of prostate cancer patients with/without PGC-1 $\alpha$  mutation. (C) Analysis of the correlation between p53 and PGC-1 $\alpha$ . (D) Cleaved caspase-3 and Bcl-2 were analyzed by western blotting in PC3 and DU145 prostate cancer cells transfected with shPGC-1 $\alpha$ . PGC-1 $\alpha$ , peroxisome proliferator-activated receptor  $\gamma$  coactivator-1 $\alpha$ ; sh, short hairpin; Con, control

**A**

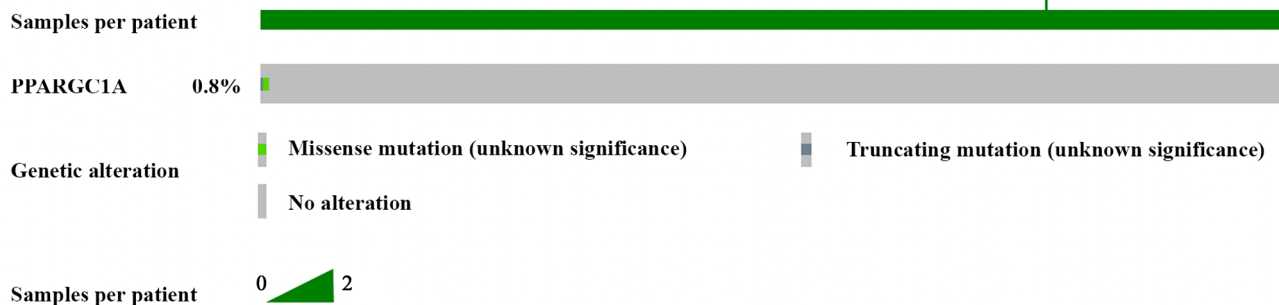

**B**

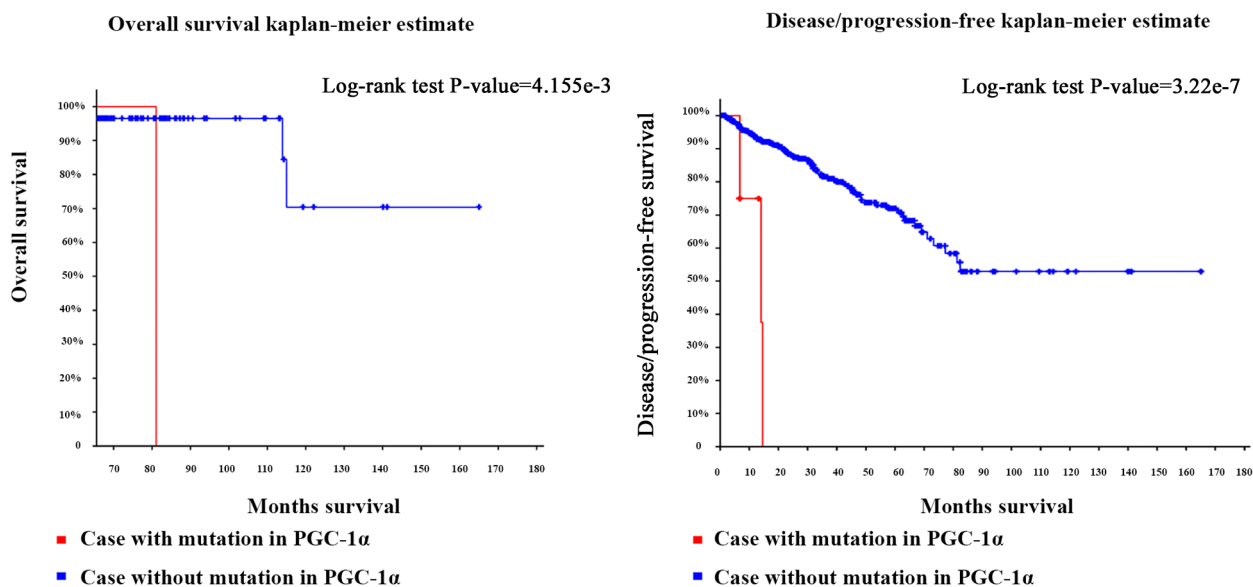

**C**

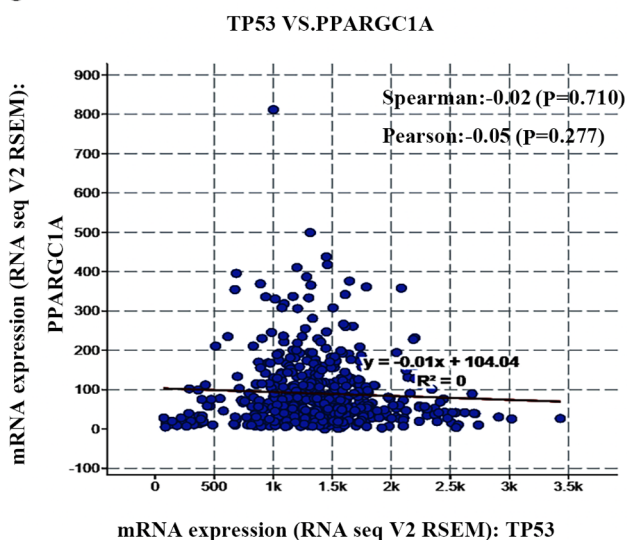

**D**

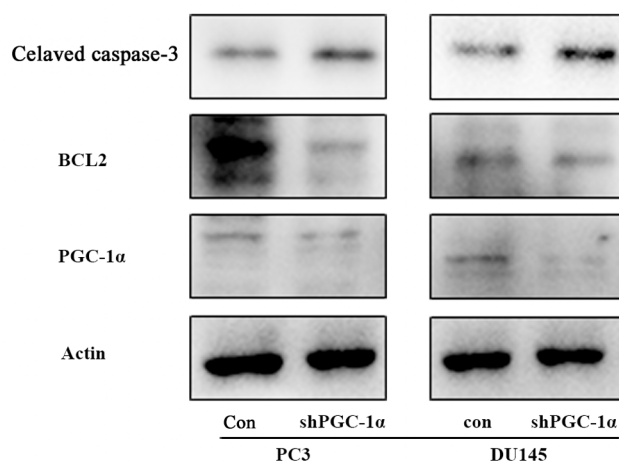

Supplement: Supplementary file 1 [file downloadSupplementary]
